# Supplementary material
Source: PubMed Central journal article supplement (PMC7438661)
Supplement: Supplemental_material.pdf [file Supplemental_material.pdf]

Sitthicharoenchai P, et al. Cases of high mortality in cull sows and feeder pigs associated with *Streptococcus equi* subsp. *zooepidemicus* septicemia

**Supplementary Table 1.** Antimicrobial susceptibility profiles of *Streptococcus equi* subsp. *zooepidemicus* on a total of 3 *S. zooepidemicus* isolates, 2 from the buying station in Ohio and 1 from the abattoir in Tennessee, determined by microbroth dilution test using a commercially available panel (Sensititre; Thermo Fisher Scientific).

|                               | MIC                             |                                 |                                | Sensitivity  |
|-------------------------------|---------------------------------|---------------------------------|--------------------------------|--------------|
|                               | Ohio buying station (isolate 1) | Ohio buying station (isolate 2) | Tennessee abattoir (isolate 3) |              |
| Ampicillin                    | ≤0.25                           | ≤0.25                           | ≤0.25                          | Susceptible  |
| Ceftiofur                     | ≤0.25                           | ≤0.25                           | ≤0.25                          | Susceptible  |
| Clindamycin                   | ≤0.25                           | ≤0.25                           | ≤0.25                          | Susceptible  |
| Danofloxacin                  | 1                               | 1                               | 1                              | NI           |
| Enrofloxacin                  | 0.5                             | 0.5                             | 0.5                            | Susceptible  |
| Florfenicol                   | 1                               | 1                               | 1                              | Susceptible  |
| Gamithromycin                 | ≤1.0                            | ≤1.0                            | ≤1.0                           | NI           |
| Gentamicin                    | 16                              | 16                              | 16                             | Resistant    |
| Neomycin                      | 32                              | 32                              | 32                             | Resistant    |
| Penicillin                    | ≤0.12                           | ≤0.12                           | ≤0.12                          | Susceptible  |
| Sulfadimethoxine              | >256.0                          | >256.0                          | >256.0                         | Resistant    |
| Spectinomycin                 | 32                              | 32                              | 32                             | NI           |
| Tetracycline                  | 4                               | 4                               | 4                              | Intermediate |
| Tiamulin                      | ≤0.5                            | ≤0.5                            | ≤0.5                           | Susceptible  |
| Tildipirosin                  | 8                               | 4                               | 4                              | NI           |
| Tilmicosin                    | ≤2.0                            | ≤2.0                            | ≤2.0                           | Susceptible  |
| Trimethoprim–sulfamethoxazole | ≤2.0                            | ≤2.0                            | ≤2.0                           | NI           |
| Tulathromycin                 | ≤8.0                            | ≤8.0                            | ≤8.0                           | NI           |
| Tylosin (tartrate/base)       | ≤0.5                            | ≤0.5                            | ≤0.5                           | NI           |

MIC = minimum inhibitory concentration; NI = no interpretation available based on antimicrobial, organism, species, and tissue combination.
